1 **Multiple acyl-CoA dehydrogenase deficiency kills *Mycobacterium tuberculosis* in vitro and**  
2 **during infection**

3 Tiago Beites<sup>1</sup>, Robert S Jansen<sup>2#</sup>, Ruojun Wang<sup>1</sup>, Adrian Jinich<sup>2</sup>, Kyu Rhee<sup>1,2</sup>, Dirk Schnappinger<sup>1</sup>, Sabine  
4 Ehrt<sup>1</sup>.

5 **Affiliations**

6 <sup>1</sup> Department of Microbiology and Immunology, Weill Cornell Medical College, New York, NY 10065 USA.

7 <sup>2</sup> Division of Infectious Diseases, Department of Medicine, Weill Cornell Medical College, New York, NY,  
8 10065, USA.

9 # Current affiliation: Department of Microbiology, Radboud University, 6525 AJ, Nijmegen, the  
10 Netherlands

11

12 **ABSTRACT**

13 The human pathogen *Mycobacterium tuberculosis* (Mtb) devotes a significant fraction of its genome to  
14 fatty acid metabolism. Although Mtb depends on host fatty acids as a carbon source, fatty acid  $\beta$ -  
15 oxidation is mediated by genetically redundant enzymes, which has hampered the development of  
16 antitubercular drugs targeting this metabolic pathway. Here, we identify *rv0338c*, referred to as *etfD<sub>Mtb</sub>*,  
17 to encode a membrane dehydrogenase essential for fatty acid  $\beta$ -oxidation in Mtb. An *etfD* deletion  
18 mutant ( $\Delta etfD$ ) was incapable of growing on fatty acids in vitro, with long-chain fatty acids being  
19 bactericidal, and failed to grow and survive in mice. The  $\Delta etfD$  metabolome revealed a block in  $\beta$ -  
20 oxidation at the step catalyzed by acyl-CoA dehydrogenases (ACADs). In many organisms, including  
21 humans, ACADs are functionally dependent on an electron transfer flavoprotein (ETF) and cognate  
22 dehydrogenase. Immunoprecipitation identified EtfD in complex with FixA (EtfB<sub>Mtb</sub>). FixA (EtfB<sub>Mtb</sub>) and  
23 FixB (EtfA<sub>Mtb</sub>) are homologous to the human ETF subunits. Our results demonstrate that EtfB<sub>Mtb</sub>  
24 constitutes Mtb's ETF, while EtfD<sub>Mtb</sub>, although not homologous to human EtfD, functions as the  
25 dehydrogenase. These findings identify Mtb's fatty acid  $\beta$ -oxidation as a novel potential target for TB  
26 drug development.

27

28 **MAIN**

29 Maintenance of an energized membrane is essential for *Mycobacterium tuberculosis* (Mtb) to grow and  
30 survive periods of non-replicating persistence<sup>1</sup>. This need has driven tuberculosis (TB) drug development  
31 efforts towards Mtb's energy metabolism. These efforts are supported by the first anti-TB drug approved  
32 in over 40 years - the ATP synthase inhibitor bedaquiline<sup>2</sup>.

33 Mtb's energy related pathways exhibit varying degrees of vulnerability to inhibition. Uptake of  
34 its main carbon sources *in vivo* is performed by specialized transporters; the multi-subunit Mce1 complex  
35 transports fatty acids<sup>3</sup> and the Mce4 complex facilitates the uptake of cholesterol<sup>4</sup>. Inactivation of Mce1  
36 can reduce intracellular growth<sup>5</sup>, while Mce4 was conclusively shown to be essential for survival during  
37 the chronic phase of infection<sup>4</sup>. Luca, which acts as a regulator of both Mce1 and Mce4, is also required  
38 for wild type levels of Mtb virulence<sup>3</sup>, further supporting that inhibiting the ability to import host lipids  
39 affects Mtb's pathogenicity.

40 Cholesterol degradation yields multiple products, including acetyl-CoA, propionyl-CoA, succinyl-  
41 CoA and pyruvate that can be used for energy generation or lipid biosynthesis<sup>6</sup>. Deletion of genes  
42 encoding cholesterol oxidation enzymes attenuated growth<sup>7</sup> and caused survival defects of Mtb in  
43 mice<sup>8,9</sup>. A screen against Mtb residing in the phagosomes of macrophages identified several compounds  
44 that target cholesterol metabolism<sup>10</sup>. In contrast, fatty acids are degraded solely through  $\beta$ -oxidation.  
45 Mtb's genome encodes multiple enzymes for each step of  $\beta$ -oxidation, including thirty-four putative acyl-  
46 CoA ligases, thirty-five putative acyl-CoA dehydrogenases, twenty-two putative enoyl-CoA hydratase,  
47 five putative  $\beta$ -hydroxyacyl-CoA dehydrogenase and six putative thiolases<sup>11</sup>. Some of these enzymes are  
48 necessary for infection, but they also have been shown to play roles in other pathways, such as complex  
49 lipid biosynthesis<sup>12</sup> and cholesterol degradation<sup>13</sup>. Due to the apparent redundancy of Mtb's fatty acid  $\beta$ -  
50 oxidation machinery, this metabolic pathway has thus been presumed to be invulnerable to chemical  
51 inhibition.

52           In the present study, we define an enzyme complex that has previously not been recognized as  
53 required for fatty acid degradation in Mtb. It consists of an electron transfer flavoprotein composed by  
54 two subunits - FixA (Rv3029c) and FixB (Rv3028c) – and a membrane dehydrogenase (Rv0338c), which  
55 we propose to re-name as EtfB<sub>Mtb</sub>, EtfA<sub>Mtb</sub> and EtfD<sub>Mtb</sub> based on their human counterparts. Deletion of  
56 Mtb's EtfD causes multiple acyl-CoA dehydrogenase deficiency, which prevents utilization of fatty acids  
57 as carbon sources and can kill Mtb in vitro and during mouse infection.

## 58 **RESULTS**

### 59 **A possible role for EtfD<sub>Mtb</sub> in Mtb's energy metabolism**

60 EtfD<sub>Mtb</sub> (Rv0338) is a membrane protein of unknown function predicted to be essential for growth of Mtb  
61 on agar plates<sup>14,15</sup>. To experimentally determine its topology, we fused *E. coli* alkaline phosphatase PhoA  
62 to EtfD at specific residues of the predicted transmembrane helices. Transport of PhoA outside of the  
63 cytoplasm enables reactivity with the chromogenic substrate 5-bromo-4-chloro-3-indolyl phosphate p-  
64 toluidine (BCIP). Based on this assay, the soluble portion of EtfD<sub>Mtb</sub> faces the cytoplasm (Supplementary  
65 Fig. 1a), and this topology agrees with the prediction generated by the MEMSAT3 algorithm<sup>16</sup>  
66 (Supplementary Fig. 1b).

67           Next, we performed in silico analysis, which placed EtfD<sub>Mtb</sub> into the cluster of orthologue groups  
68 o247 (COG0247) composed of Fe-S oxidoreductases involved in energy production and conversion (Fig.  
69 1a). COG0247 includes a variety of enzymes, including lactate dehydrogenase and the methanogenic-  
70 related heterodisulfide reductase; however, most proteins in COG0247 remain uncharacterized and are  
71 of unknown function. EtfD<sub>Mtb</sub> is predicted to be a chimeric enzyme assembled from four domains: an N-  
72 terminal domain, which is similar to the gamma subunit of nitrate reductases and putatively binds a  
73 cytochrome b; a central 4Fe-4S di-cluster domain similar to succinate dehydrogenases; and two C-

74 terminal cysteine-rich domains (CCG), which are often found in heterodisulfide reductases (Fig. 1b). This  
75 analysis led us to hypothesize that EtfD is a component of Mtb's energy metabolism.

## 76 **EtfD<sub>Mtb</sub> is linked to fatty acid metabolism and it is essential in vivo**

77 To analyze the impact of EtfD<sub>Mtb</sub> depletion on Mtb's growth in vitro, we generated a TetOFF strain, in  
78 which EtfD levels are controlled by anhydrotetracycline (ATC)-inducible proteolysis<sup>17</sup>. Depletion of  
79 EtfD<sub>Mtb</sub> inhibited Mtb's growth in regular medium supplemented with oleic acid, albumin, dextrose and  
80 catalase (OADC), which is consistent with its predicted essentiality (Fig. 1c). Curiously, when the same  
81 medium was supplemented with a fatty acid free enrichment (albumin, dextrose and sodium chloride,  
82 ADN), depletion of EtfD<sub>Mtb</sub> did not impact growth (Fig. 1c). This is similar to the fatty acid sensitive  
83 phenotype observed in response to inactivation of Mtb's type II NADH dehydrogenases<sup>18</sup> which allowed  
84 the genetic deletion of Ndh-2 by growth in a fatty acid free medium. We applied the same strategy to  
85 *etfD*<sub>Mtb</sub> and generated a deletion strain ( $\Delta etfD$ ) (Supplementary Fig. 2a). The  $\Delta etfD$ <sub>Mtb</sub> strain was  
86 confirmed by whole genome sequencing (WGS) to not contain additional polymorphisms known to  
87 affect growth (Supplementary Table 1). This knockout strain also phenocopied the fatty acid sensitivity  
88 observed with the knockdown mutant (Supplementary Fig. 2b).

89 We next sought to investigate the importance of *etfD*<sub>Mtb</sub> for pathogenesis in an aerosol model of  
90 TB infection in mice. After aerosol infection,  $\Delta etfD$  was unable to grow in mouse lungs and declined in  
91 viability from day 14 onwards (Fig. 2a, Supplementary Fig. 3a). In agreement with the CFU data, gross  
92 lung pathology showed no lesions in the mice infected with  $\Delta etfD$  (Fig. 2b, Supplementary Fig. 3b). The  
93 attenuation was even more pronounced in spleens, where no  $\Delta etfD$  CFU were recovered at any time point  
94 (Fig. 2a, Supplementary Fig. 3a). All phenotypes were rescued by reintroducing an intact copy of *etfD*<sub>Mtb</sub>.

95 **Mtb requires EtfD<sub>Mtb</sub> to consume fatty acids as a carbon source and to prevent toxicity of**  
96 **long-chain fatty acids**

97 The fatty acid sensitivity of  $\Delta etfD$  suggested that this protein is, directly or indirectly, required for fatty  
98 acid metabolism. To test this further, we grew strains in media with different single carbon sources.  $\Delta etfD$   
99 was able to grow in both glycolytic (glycerol) and gluconeogenic (acetic acid and propionic acid) carbon  
100 sources, although at a slower rate than the wild type (Fig. 3a). However, longer chain fatty acids (butyric  
101 acid, palmitic acid and oleic acid) did not support detectable growth of  $\Delta etfD$  (Fig. 3b). Fatty acids with  
102 four carbons or more in length require functional  $\beta$ -oxidation to be utilized, hence these results indicated  
103 that  $\Delta etfD$  might display a defect in  $\beta$ -oxidation.

104 To distinguish between two possible interpretations, namely 1)  $\Delta etfD$  simply failed to use fatty  
105 acids as carbon source and 2)  $\Delta etfD$  was intoxicated by fatty acids, we tested if glycerol could rescue the  
106 impaired growth of  $\Delta etfD$  with fatty acids. Glycerol was able to restore growth in medium with butyric  
107 acid as carbon source, but it was not able to restore growth with long-chain fatty acids (Supplementary  
108 Fig. 4). This argued for a toxic effect and led us to evaluate the impact of fatty acids on the viability of  
109  $\Delta etfD$ . We found that butyric acid is bacteriostatic, while long-chain fatty acids are bactericidal to  $\Delta etfD$   
110 (Fig. 3c). Glycerol did not rescue the bactericidal effect of long-chain fatty acids.

111 **Mtb acyl-CoA dehydrogenase activity requires EtfD<sub>Mtb</sub>**

112 We applied metabolomics to understand why the consumption of fatty acids is prevented in the absence  
113 of EtfD<sub>Mtb</sub>. We focused these studies on  $^{13}\text{C}_4$ -labelled butyric acid to isolate the impact of *etfD* disruption  
114 on fatty acid consumption from potentially additional confounding effects associated with the toxicity of  
115 longer chain fatty acids. Inspection of labelled metabolites in central carbon metabolism confirmed the  
116 presence of butyric acid in WT,  $\Delta etfD$ , and the complemented mutant (Fig. 4, Supplementary Fig. 5). All  
117 three strains were thus able to import  $^{13}\text{C}_4$ -labelled butyric acid.

118 To be catabolized through  $\beta$ -oxidation, butyric acid needs to be transformed by an acyl-CoA  
119 ligase into butyryl-CoA. Strikingly, butyryl-CoA accumulated in  $\Delta etfD$  approximately 45-fold relative to  
120 WT and the complemented mutant. The remaining intermediates of butyric acid  $\beta$ -oxidation were not  
121 detectable in any of the strains, but the pool size of the end-product acetyl-CoA was approximately 2-  
122 fold lower in  $\Delta etfD$  than in WT. Labelled TCA cycle intermediates, with the exception of succinyl-CoA,  
123 were also partially depleted in  $\Delta etfD$  (Fig. 4, Supplementary Fig. 5). The metabolomic profile of  $\Delta etfD$ ,  
124 specifically the accumulation of butyryl-CoA, strongly suggested that inactivation of EtfD interfered with  
125 the function of acyl-CoA dehydrogenases (ACAD), which in turn impaired fatty acid catabolism.

## 126 **EtfD<sub>Mtb</sub> interacts with an electron transfer protein**

127 We immunoprecipitated EtfD<sub>Mtb</sub> and identified putative interacting proteins by mass spectrometry.  
128 Among the 49 total hits (Supplementary Table 2), 41 were located or predicted to be located at the  
129 membrane/cell wall, while the remaining 8 were cytoplasmic proteins. To investigate possible links to  $\beta$ -  
130 oxidation – a cytoplasmic process – we focused on the cytoplasmic interactors, which consisted of two  
131 flavoproteins EtfB<sub>Mtb</sub> and Rv1279, the sigma factor SigA, a putative helicase Rv1179c, an  
132 exopolyphosphatase Ppx1, the phthiocerol dimycocerosate (PDIM) biosynthesis enzyme PpsC, the  
133 protease ClpP2, and Rv1215c, a protein with putative proteolytic activity (Fig. 5a). We were especially  
134 interested in the flavoprotein EtfB<sub>Mtb</sub>, because of its homology (30% identity; 87% coverage) with the  
135 beta-subunit of the human electron transfer flavoprotein (ETF). Moreover, *etfB<sub>Mtb</sub>* (annotated as *fixA* –  
136 *rv3029c*) forms an operon with *etfA<sub>Mtb</sub>* (annotated as *fixB* – *rv3028c*), which shares homology with the  
137 alpha subunit of the human ETF (41% identity; 98% coverage). In humans, ETF<sup>19</sup> interacts with a cognate  
138 membrane dehydrogenase<sup>20</sup> (EtfD) and both are required to re-oxidize the FAD co-factor of multiple  
139 ACADs. This led us hypothesize that Mtb might display a similar activity. Although EtfD<sub>Mtb</sub> is not a

140 homologue of the human EtfD, our working model predicted that EtfBA<sub>Mtb</sub> and EtfD<sub>Mtb</sub> constitute a  
141 complex necessary for the activity of ACADs in Mtb (Fig. 5b).

142 To further assess a functional connection between EtfD<sub>Mtb</sub> and EtfBA<sub>Mtb</sub>, we asked if these  
143 proteins co-occur across bacterial proteomes. A BLASTp search against a database of 6240 bacterial  
144 proteomes (identity cutoff of >30 % and coverage cutoff of >75%) identified 469 EtfD<sub>Mtb</sub>, 473 EtfB<sub>Mtb</sub> and  
145 472 EtfA<sub>Mtb</sub> homologues, 98% of which occur in actinobacteria, with the spirochete *Leptospira interrogans*  
146 – the causative agent of leptospirosis – as a notable exception (Figure 5c; Supplementary Data 1). EtfD,  
147 EtfB and EtfA showed a strong co-occurrence (p-value <10<sup>-10</sup>), which was suggestive of a functional  
148 connection. Curiously, similar to Mtb, *L. interrogans* is proposed to use host-derived fatty acids as the  
149 primary carbon sources during infection<sup>21</sup>.

150 These results support the hypothesis that EtfD<sub>Mtb</sub> serves as a dehydrogenase for EtfBA<sub>Mtb</sub>, which in turn  
151 is necessary for the activity of ACADs.

### 152 **EtfBA<sub>Mtb</sub> and EtfD<sub>Mtb</sub> are required for acyl-CoA dehydrogenase activity**

153 If EtfBA<sub>Mtb</sub> and EtfD<sub>Mtb</sub> participate in the same biochemical pathway then inactivation of EtfBA<sub>Mtb</sub> should  
154 also impair the use of fatty acids as single carbon sources by Mtb. To test this prediction, we first isolated  
155 a knockout strain for *etfBA* in fatty acid free medium (Supplementary Fig. 6) and confirmed its genetic  
156 identity through WGS (Supplementary Table 1). We then grew wild type,  $\Delta etfBA$  and complemented  
157  $\Delta etfBA$  in media with different carbon sources.  $\Delta etfBA$  was able to grow with glycerol, albeit slower than  
158 WT (Fig. 6a). In contrast, we did not detect growth in either butyric acid or oleic acid as single carbon  
159 sources, corroborating our prediction (Fig. 6b and c).

160 To independently test the role of EtfBA<sub>Mtb</sub> and EtfD<sub>Mtb</sub> in fatty acid oxidation, we assessed if an  
161 acyl-CoA oxidase (ACO) could allow both  $\Delta etfBA$  and  $\Delta etfD$  to grow with fatty acids. ACOs are  
162 peroxisomal enzymes that catalyze the same reaction as ACADs using molecular oxygen to re-oxidize



163 FAD rather than ETF/ETFD<sup>22</sup>. The gene *pox3*, which encodes the extensively characterized ACO Pox3  
164 from the yeast *Yarrowia lipolytica*<sup>23,24</sup> (Fig. 6d), was codon adapted for Mtb and expressed under the  
165 control of a strong, constitutive promoter in both  $\Delta etfBA$  and  $\Delta etfD$ . Pox3 has a high affinity for fatty  
166 acids with six and eight carbons chain length and low affinity for most other fatty acids<sup>23</sup>; thus, we grew  
167 strains in a medium with octanoic acid (high affinity), butyric acid (low affinity) or oleic acid (low affinity)  
168 as single carbon sources.  $\Delta etfD$  was not able to utilize octanoic acid as single carbon source, further  
169 confirming its inability to oxidize multiple fatty acids, while the growth rate of  $\Delta etfD::pox3$  was similar to  
170 that of WT and complemented strain (Fig. 6e). A similar result was obtained with butyric acid, although  
171 it took longer for  $\Delta etfD::pox3$  to reach wild type density (Supplementary Fig. 7). As expected, based on  
172 the affinity profile and function of Pox3, *pox3* did not rescue  $\Delta etfD$  growth with oleic acid as single carbon  
173 source and it did not alter the growth rate on glycerol. Similarly,  $\Delta etfBA$  did not grow on octanoic acid as  
174 single carbon source, while  $\Delta etfBA::pox3$  was able to grow in the same medium, although reaching a  
175 lower final optical density than WT and complemented mutant.  $\Delta etfBA::pox3$  was able to grow with  
176 butyric acid entering stationary phase 21 days after wild-type and complemented strain, it did not grow  
177 with oleic acid and it conferred a slight advantage on glycerol when compared with  $\Delta etfBA$  (Fig. 6e and  
178 Supplementary Fig. 7).

179 These results confirmed that EtfBA<sub>Mtb</sub> and EtfD<sub>Mtb</sub> constitute a complex necessary for the activity of fatty  
180 acid  $\beta$ -oxidation ACADs.

## 181 DISCUSSION

182 Mtb's energy metabolism displays a remarkable plasticity which supports its adaptation to a multitude  
183 of host microenvironments<sup>25</sup>. Its unusual domain structure suggested that the membrane protein  
184 encoded by *rv0338c* could be an unrecognized, essential component of Mtb's energy metabolism. Our  
185 studies identified Rv0338c as a member of a short electron transfer pathway essential for ACADs activity.

186 Based on the similarity of this system to the human ETF system we propose to rename the respective  
187 Mtb genes as *etfD*<sub>Mtb</sub> (*rv0338c*), *etfB*<sub>Mtb</sub> (*rv3028c*) and *etfA*<sub>Mtb</sub> (*rv3029c*).

188 The increased susceptibility to fatty acids of an *EtfD*<sub>Mtb</sub> TetOff strain suggested a possible connection  
189 with fatty acid metabolism. Accordingly, our data showed that an *etfD*<sub>Mtb</sub> deletion mutant was not  
190 capable of utilizing fatty acids with four carbons or more as single carbon sources, thus indicating  
191 impairment in  $\beta$ -oxidation. This was associated with different outcomes regarding viability: butyric acid  
192 (short-chain) was bacteriostatic, while palmitic acid and oleic acid (long-chain) were bactericidal.  
193 Importantly,  $\Delta$ *etfD* did not grow and presented a survival defect in mice. Long-chain fatty acids, including  
194 oleic acid, are common components of human macrophages<sup>26</sup> and a carbon source for Mtb. Hence, the  
195 inability to utilize fatty acids together with the increased susceptibility to long-chain fatty acids likely  
196 explain the in vivo essentiality of *EtfD*<sub>Mtb</sub>. The mechanism of long-chain fatty acid toxicity to Mtb is still  
197 poorly understood, even though it was first described in the 1940's<sup>27</sup>. In other bacteria, several  
198 mechanistic explanations have been proposed for the bactericidal activity of long-chain fatty acids,  
199 including membrane potential disruption<sup>28,29</sup>, oxidative stress induction<sup>30</sup>, or fatty acid biosynthesis  
200 inhibition<sup>31</sup>.

201 The metabolome of  $\Delta$ *etfD* in medium with butyric acid as sole carbon source revealed an accumulation  
202 of butyryl-CoA which indicated an impairment in  $\beta$ -oxidation. This can explain the inability of  $\Delta$ *etfD* to  
203 oxidize fatty acids and connects *EtfD*<sub>Mtb</sub> with the  $\beta$ -oxidation enzymes that act on acyl-CoAs – the  
204 ACADs. None of Mtb's thirty-five annotated ACADs are essential in vivo<sup>32</sup> and there are no reports  
205 showing a specific ACAD being essential in vitro for the utilization of any fatty acid. Thus, ACADs are  
206 likely to be functionally redundant. However, this redundancy was not sufficient to support growth of  
207  $\Delta$ *etfD* in media with fatty acids as single carbon sources, strongly suggesting that *EtfD*<sub>Mtb</sub> is necessary for  
208 the activity of multiple, if not all, ACADs.

209 Immunoprecipitation using EtfD<sub>Mtb</sub> as bait revealed multiple possible interacting proteins, suggesting  
210 that EtfD<sub>Mtb</sub> might integrate several pathways in Mtb. We were especially interested in the interaction  
211 with the cytoplasmic protein EtfB<sub>Mtb</sub>, which together with EtfA<sub>Mtb</sub> constitute a putative electron transfer  
212 flavoprotein (ETF). The human homologues (EtfAB) form an enzyme that re-oxidizes the FAD co-factor  
213 of multiple ACADs and transfers the electrons to the membrane bound oxidoreductase electron transfer  
214 flavoprotein dehydrogenase (EtfD), which then reduces the electron carrier ubiquinone, hence  
215 contributing to the generation of energy<sup>33</sup>. Mutations rendering defects in EtfAB or EtfD lead to a  
216 metabolic disease named multiple acyl-CoA dehydrogenase deficiency, which among other outcomes is  
217 characterized by the inability to oxidize fatty acids<sup>34</sup>. This led us to hypothesize that Mtb's EtfB<sub>Mtb</sub> and  
218 EtfD<sub>Mtb</sub> might work together in a similar pathway. That EtfD<sub>Mtb</sub> and EtfB<sub>Mtb</sub> show a strong pattern of co-  
219 occurrence across bacterial proteomes and  $\Delta etfBA$  was unable to utilize fatty acids as carbon sources  
220 were strong indications in favor of our hypothesis. Nevertheless, for a yet unclear mechanism, it was  
221 notable that  $\Delta etfBA$  grew more slowly than  $\Delta etfD$ . The expression of the acyl-CoA oxidase Pox3<sup>23,24</sup>, an  
222 enzyme that catalyzes the same reaction as ACADs, but uses molecular oxygen as an electron acceptor<sup>22</sup>,  
223 was able to rescue the growth of both  $\Delta etfD$  and  $\Delta etfBA$  in fatty acids as single carbon source, showing  
224 that in both cases  $\beta$ -oxidation was impaired at the ACAD step and confirming our proposed hypothesis.  
225 Although we report a function in  $\beta$ -oxidation, it is possible that these proteins may have additional roles  
226 in Mtb. It has recently been reported that both EtfB<sub>Mtb</sub> and EtfD<sub>Mtb</sub> are essential for resisting toxicity in  
227 media containing heme<sup>35</sup>. This further strengthened the functional relation between these proteins and  
228 suggested a role in iron metabolism. Interestingly, transcript levels of *etfD*<sub>Mtb</sub>, but not *etfBA*<sub>Mtb</sub>, respond  
229 to the iron content of the medium in an IdeR (iron metabolism transcriptional regulator) dependent  
230 manner<sup>36,37</sup>. Whether the EtfB<sub>Mtb</sub>/ EtfD<sub>Mtb</sub> complex has a direct or indirect role in heme utilization and if  
231 this has any in vivo relevance remain to be addressed.

232 In conclusion, we have identified a complex composed of EtfBAMtb and the cognate membrane  
233 dehydrogenase EtfDMtb that is required for the function of multiple ACADs. This complex constitutes a  
234 previously unsuspected vulnerable component of Mtb's  $\beta$ -oxidation machinery. EtfDMtb has no structural  
235 homologues in humans and was recently proposed as the target of a compound that is bactericidal  
236 against Mtb<sup>38</sup>, which suggests that it could serve as a novel target for TB drug development. The presence  
237 of EtfDMtb and EtfBAMtb homologues in *Leptospira interrogans* suggests that this pathway might be  
238 relevant for other pathogens that rely on host fatty acids as carbon sources<sup>21</sup>.

## 239 METHODS

### 240 Culture conditions

241 For cloning purposes we used *Escherichia coli* as a host, which was cultured in LB medium at 37  
242 °C. *Mtb* was cultured at 37 °C in different media: Middlebrook 7H9 supplemented with 0.2% glycerol,  
243 0.05% tyloxapol, and ADNaCl (0.5% fatty acid free BSA from Roche, 0.2% dextrose and 0.85% NaCl) or  
244 in Middlebrook 7H10 supplemented with 0.5% glycerol and 10% oleic acid-albumin-dextrose-catalase  
245 (OADC), and in a modified Sauton's minimal medium (0.05% potassium dihydrogen phosphate, 0.05%  
246 magnesium sulfate heptahydrate, 0.2% citric acid, 0.005% ferric ammonium citrate, and 0.0001% zinc  
247 sulfate) supplemented with 0.05% tyloxapol, 0.4% glucose, 0.2% glycerol, and ADNaCl with fatty-acid-  
248 free BSA (Roche). Modified Sauton's solid medium contained 1.5% bactoagar (BD) and glycerol at a  
249 higher concentration (0.5%). For single or mixed carbon source cultures we have used glycerol 25 mM,  
250 sodium acetate 2.5 mM, propionic acid 2.5 mM and butyric acid 2.5 mM. Octanoic acid, palmitic acid and  
251 oleic acid were added at a final concentration of 200 µM and were replenished every 3-4 days for the first  
252 14 days, since these fatty acids are toxic if added initially in the mM range. *Mycobacterium smegmatis* MC<sup>2</sup>  
253 155 was cultured in Middlebrook 7H10 supplemented with 0.2% glycerol at 37 °C. Antibiotics were used  
254 at the following final concentrations: carbenicillin 100 µg/ml, hygromycin 50 µg/ml and kanamycin 50  
255 µg/ml.

### 256 Mutant construction

257 *Mtb* H37Rv *etfD*<sub>Mtb</sub> conditional knockdown was generated using a previously described strategy that  
258 control expression through proteolysis<sup>39</sup>. Briefly, a Flag tag and DAS+4 tag were added to the 3' end of  
259 *etfD*<sub>Mtb</sub>, at the 3' end of the target gene. This strain was then transformed with a plasmid expressing the  
260 adaptor protein SspB under the control of TetR regulated promoters. In the presence of  
261 anhydrotetracycline (ATC) 500 µg/ml, TetR loses affinity to the promoter and *sspB* expression is de-

262 repressed. SspB acts by delivering DAS<sub>4</sub>-tagged proteins to the native ClpXP protease. Hence, when  
263 ATC is added to the culture, SspB expression is induced and EtfD<sub>Mtb</sub>-DAS-tag is degraded, working as a  
264 TetOFF system (EtfD<sub>Mtb</sub>-TetOFF).

265 We have obtained deletion mutants through recombineering by using Mtb H37Rv expressing the  
266 recombinase RecET. Constructs with the hygromycin resistant gene (*hygR*) flanked by 500 bp upstream  
267 and downstream of the target loci were synthesized (GeneScript). In the case of *etfD*, since the flanking  
268 gene *aspC* is in the same orientation and it is essential for growth<sup>40</sup>, we have included in the construct the  
269 constitutive promoter *hsp60* to avoid polar effects. Mutants were selected in modified Sauton's with  
270 hygromycin. The plasmid expressing *recET* was counterselected by growing the deleted mutants in  
271 modified Sauton's supplemented with sucrose 10 %. For complementation we have cloned *etfD* and  
272 *etfBA* under the control of the promoter *phsp60* into a plasmid with a kanamycin resistant cassette that  
273 integrates at the att-L<sub>5</sub> site (pMCK-*phsp60-etfD* and pMCK-*phsp60-etfBA*) and transformed the deleted  
274 mutants. The gene *pox3* from *Yarrowia lipolytica* was codon adapted for *Mtb* use, synthesized  
275 (GeneScript), cloned into a plasmid under the control of the promoter pTB<sub>38</sub>, with a kanamycin resistant  
276 cassette that integrates in the att-L<sub>5</sub> site (pMCK-pTB<sub>38-pox3</sub>) and transformed into both *etfD*<sub>Mtb</sub> and  
277 *etfBA*<sub>Mtb</sub> deletion mutants. All generated strains and plasmids are listed in Supplementary Tables 3 and  
278 4, respectively.

## 279 **Whole genome sequencing**

280 The genetic identity of  $\Delta etfD$  and  $\Delta etfBA$  was confirmed by whole genome sequencing (WGS).  
281 Between 150 and 200 ng of genomic DNA was sheared acoustically and HiSeq sequencing libraries were  
282 prepared using the KAPA Hyper Prep Kit (Roche). PCR amplification of the libraries was carried out for  
283 10 cycles. 5–10 × 10<sup>6</sup> 50-bp paired-end reads were obtained for each sample on an Illumina HiSeq 2500  
284 using the TruSeq SBS Kit v3 (Illumina). Post-run demultiplexing and adapter removal were performed

285 and fastq files were inspected using fastqc (Andrews S. (2010). FastQC: a quality control tool for high  
286 throughput sequence data. Available at: <http://www.bioinformatics.babraham.ac.uk/projects/fastqc>).  
287 Trimmed fastq files were then aligned to the reference genome (*M. tuberculosis* H37RvCO;  
288 NZ\_CM001515.1) using bwa mem<sup>47</sup>. Bam files were sorted and merged using samtools<sup>48</sup>. Read groups  
289 were added and bam files de-duplicated using Picard tools and GATK best-practices were followed for  
290 SNP and indel detection<sup>49</sup>. Gene knockouts and cassette insertions were verified for all strains by direct  
291 comparison of reads spanning insertion points to plasmid maps and the genome sequence. Reads  
292 coverage data was obtained from the software Integrative Genomics Viewer (IGV)<sup>41-43</sup>. Sequencing data  
293 was deposited in NCBI's Sequence Read Archive (SRA) database under the BioProject PRJNA670664.

#### 294 **PhoA fusion assay**

295 Truncated versions of EtfD<sub>Mtb</sub> were fused with the *E. coli* alkaline phosphatase PhoA. This enzyme  
296 requires the oxidative environment of the periplasm to be active and degrades the substrate BCIP  
297 generating a blue precipitate. We have fused *phoA* at different residues located in the transmembrane  
298 domains. Positive control consisted in PhoA fused with the antigen 85B, while the negative control was  
299 PhoA alone<sup>44</sup>. All plasmids were transformed in *M. smegmatis* MC2 and the assay was performed in LB  
300 plates with and without BCIP.

#### 301 **Mouse infection**

302 Mouse experiments were performed in accordance with the Guide for the Care and Use of Laboratory  
303 Animals of the National Institutes of Health, with approval from the Institutional Animal Care and Use  
304 Committee of Weill Cornell Medicine. Female C57BL/6 mice (Jackson Labs) were infected with ~100–200  
305 CFU/mouse using an Inhalation Exposure System (Glas-Col). Strains were grown to mid-exponential  
306 phase and single-cell suspensions were prepared in PBS with 0.05% Tween 80, and then resuspended in

307 PBS. Lungs and spleen were homogenized in PBS and plated on modified Sauton's medium to determine  
308 CFU/organ at the indicated time points.

### 309 **Metabolomics**

310 Strains were grown in modified Sauton's until an  $OD_{580nm}$  of 1 and 1 ml of culture was used to seed  
311 filters<sup>45</sup> placed on top of solid modified Sauton's medium. Bacteria grew for 7 days, after which the filters  
312 were transferred to solid modified Sauton's medium with butyric acid or <sup>13</sup>C-labelled butyric acid  
313 (Cambridge Isotope Laboratories, Inc) at a final concentration of 2.5 mM for 24 h. For metabolite  
314 extraction bacteria were disrupted by bead beating 3 cycles, 50 seconds (Precellys 24, Bertia  
315 technologies) in a solution of acetonitrile:methanol:water (4:4:2).

316 The relative abundances of butyric acid, CoA species and TCA intermediates were determined using an  
317 ion-pairing LC-MS system, as previously described<sup>46</sup>. In brief, samples (5  $\mu$ L) were injected onto a  
318 ZORBAX RRHD Extend-C18 column (2.1 x 150 mm, 1.8  $\mu$ m; Agilent Technologies) with a ZORBAX SB-C8  
319 (2.1 mm x 30 mm, 3.5  $\mu$ m; Agilent Technologies) precolumn heated to 40 °C and separated using a  
320 gradient of methanol in 5 mM tributylamine/5.5 mM acetate. Post-column, 10% dimethyl sulfoxide in  
321 acetone (0.2 mL/min) was mixed with the mobile phases to increase sensitivity. Detection was performed  
322 from m/z 50-1100, using an Agilent Accurate Mass 6230 Time of Flight (TOF) spectrometer with Agilent  
323 Jet Stream electrospray ionization source operating in the negative ionization mode. Incorporation of <sup>13</sup>C  
324 was quantitated and corrected for natural <sup>13</sup>C abundance using Profinder B.08.00 (Agilent Technologies).  
325 LC-MS data was deposited in the MetaboLights database<sup>47</sup> under the accession code MTBLS2374  
326 ([www.ebi.ac.uk/metabolights/MTBLS2374](http://www.ebi.ac.uk/metabolights/MTBLS2374)).

327



## 328 Immunoprecipitation

329 We transformed *ΔetfD* with a plasmid expressing flag tagged EtfD under hsp60 promoter (pMEK-  
330 Phsp60-etfD<sub>Mtb</sub>-flag) and used WT Mtb expressing only the flag tag as a control. Mtb whole-cell lysates  
331 were collected from 120 ml log phase culture in butyric acid single carbon source Sauton's medium,  
332 incubated with 1% DDM for two hours on ice, followed by anti-Flag beads (Sigma) overnight incubation  
333 with gentle rotation. Beads were collected on the second day, washed with lysis buffer (50 mM Tris-HCl,  
334 50 mM NaCl, pH 7.4), and eluted with 100 ng/μl Flag peptide. The eluates were resolved on SDS-PAGE  
335 before mass spectrometry.

336 For mass spectrometry analysis, the total spectrum count (TSC) from biological duplicates were  
337 summed. We calculated the ratio of summed TSC from EtfD<sub>Mtb</sub>-Flag vs. Flag control and used a cut-off  
338 of  $\geq 10$ .

## 339 In silico analysis

340 Transmembrane domain topology of EtfD<sub>Mtb</sub> was performed in MEMSAT3<sup>16</sup>. Domain architecture of  
341 EtfD<sub>Mtb</sub>, EtfB and EtfA was based on HHPred<sup>48</sup> and XtalPred<sup>49</sup>. Eggnog<sup>50</sup> was used for the cluster of  
342 orthologous groups analysis (COG). The members of COG247 that include *etfD* were used to generate a  
343 rootless phylogenetic tree in iTOL<sup>51</sup>.

344 To analyze the presence or absence of EtfD<sub>Mtb</sub>, EtfB<sub>Mtb</sub>, and EtfA<sub>Mtb</sub> homologues across bacterial species,  
345 we obtained the set of UniProt reference bacterial proteomes, which are selected both manually and  
346 algorithmically by UniProt as landmarks in (bacterial) proteome space<sup>52</sup>. We discarded proteomes with  
347 no taxonomic labels and performed the analysis on a final set of 6240 bacterial reference proteomes.  
348 Using EtfD<sub>Mtb</sub>, EtfB<sub>Mtb</sub>, and EtfA<sub>Mtb</sub> as query protein sequences, we used the following protein BLAST  
349 (BLASTp) parameter values: identity cutoff of  $>30\%$ , coverage cutoff of  $>75\%$ , e-value cutoff of  $10^{-3}$ .  
350 Visual representations of phylogenies with surrounding color-coded rings were generated using the

351 software tool GraPhLan<sup>53</sup>, with the phylogenetic tree built from the taxonomic categorization of the 6240  
352 UniProt bacterial reference proteomes. To evaluate the statistical significance of co-occurrence of  
353 EtfD<sub>Mtb</sub> and EtfBA<sub>Mtb</sub> in Actinobacteria, we performed a hypergeometric test to evaluate the probability  
354 of observing k species with EtfD and EtfBA homologues, given M Actinobacterial species, n species with  
355 EtfD homologues, and N species with EtfBA homologues.

## 356 **Quantification and statistical analysis**

357 Generation of graphics and data analyses were performed in Prism version 8.0 software (GraphPad).

## 358 **ACKNOWLEDGEMENTS**

359 We thank J. McConnell and C. Trujillo for help with strain generation and in vivo characterization. We  
360 thank K.G. Papavinasasundaram (University of Massachusetts), R. Aslebagh and S.A. Shaffer (University  
361 of Massachusetts, Mass Spectrometry Facility) for LC-MS/MS analysis. We acknowledge J.M. Bean from  
362 MSKCC and the use of the Integrated Genomics Operation Core at MSKCC, funded by the NCI Cancer  
363 Center Support Grant (CCSG, P30 CA08748), Cycle for Survival and the Marie-Josée and Henry R. Kravis  
364 Center for Molecular Oncology. D.S and S.E were supported by Tri-Institutional TB Research Unit  
365 U19AI111143. T.B. was supported by a Potts Memorial Foundation fellowship.

366  
367 **Author contributions:** S.E. and D.S. conceived ideas, supervised the study and revised the manuscript.  
368 T.B. conceived ideas, performed experimental work, analysed and interpreted data and wrote the  
369 manuscript. R.S.J., R.W. performed experimental work, analysed and interpreted data and reviewed the  
370 manuscript. A.J. performed the in silico analysis and reviewed the manuscript. K.Y.R supervised the  
371 metabolomics experiments and reviewed the manuscript.

372

373 **Competing interests:** The authors declare that they have no competing interests.

374

375 **Materials and Correspondence:** All correspondence and material requests can be made to Sabine Ehrt

376 (sae2004@med.cornell.edu)

377

## 378 References

- 379 1 Rao, S. P., Alonso, S., Rand, L., Dick, T. & Pethe, K. The protonmotive force is required for  
380 maintaining ATP homeostasis and viability of hypoxic, nonreplicating *Mycobacterium*  
381 *tuberculosis*. *Proceedings of the National Academy of Sciences of the United States of America* **105**,  
382 11945-11950, doi:10.1073/pnas.0711697105 (2008).
- 383 2 Mahajan, R. Bedaquiline: First FDA-approved tuberculosis drug in 40 years. *Int J Appl Basic Med*  
384 *Res* **3**, 1-2, doi:10.4103/2229-516x.112228 (2013).
- 385 3 Nazarova, E. V. *et al.* Rv3723/LucA coordinates fatty acid and cholesterol uptake in  
386 *Mycobacterium tuberculosis*. *eLife* **6**, doi:10.7554/eLife.26969 (2017).
- 387 4 Pandey, A. K. & Sasseti, C. M. Mycobacterial persistence requires the utilization of host  
388 cholesterol. *Proceedings of the National Academy of Sciences of the United States of America* **105**,  
389 4376-4380, doi:10.1073/pnas.0711159105 (2008).
- 390 5 Gioffré, A. *et al.* Mutation in mce operons attenuates *Mycobacterium tuberculosis* virulence.  
391 *Microbes and infection* **7**, 325-334, doi:10.1016/j.micinf.2004.11.007 (2005).
- 392 6 Wilburn, K. M., Fieweger, R. A. & VanderVen, B. C. Cholesterol and fatty acids grease the wheels  
393 of *Mycobacterium tuberculosis* pathogenesis. *Pathogens and disease* **76**,  
394 doi:10.1093/femspd/fty021 (2018).
- 395 7 Chang, J. C. *et al.* igr Genes and *Mycobacterium tuberculosis* cholesterol metabolism. *Journal of*  
396 *bacteriology* **191**, 5232-5239, doi:10.1128/jb.00452-09 (2009).
- 397 8 Hu, Y. *et al.* 3-Ketosteroid galpha-hydroxylase is an essential factor in the pathogenesis of  
398 *Mycobacterium tuberculosis*. *Molecular microbiology* **75**, 107-121, doi:10.1111/j.1365-  
399 2958.2009.06957.x (2010).
- 400 9 Nesbitt, N. M. *et al.* A thiolase of *Mycobacterium tuberculosis* is required for virulence and  
401 production of androstenedione and androstadienedione from cholesterol. *Infection and*  
402 *immunity* **78**, 275-282, doi:10.1128/iai.00893-09 (2010).
- 403 10 VanderVen, B. C. *et al.* Novel inhibitors of cholesterol degradation in *Mycobacterium tuberculosis*  
404 reveal how the bacterium's metabolism is constrained by the intracellular environment. *PLoS*  
405 *pathogens* **11**, e1004679, doi:10.1371/journal.ppat.1004679 (2015).
- 406 11 Cole, S. T. *et al.* Deciphering the biology of *Mycobacterium tuberculosis* from the complete  
407 genome sequence. *Nature* **393**, 537-544, doi:10.1038/31159 (1998).
- 408 12 Cox, J. S., Chen, B., McNeil, M. & Jacobs, W. R., Jr. Complex lipid determines tissue-specific  
409 replication of *Mycobacterium tuberculosis* in mice. *Nature* **402**, 79-83, doi:10.1038/47042 (1999).
- 410 13 Wipperman, M. F., Yang, M., Thomas, S. T. & Sampson, N. S. Shrinking the FadE proteome of  
411 *Mycobacterium tuberculosis*: insights into cholesterol metabolism through identification of an  $\alpha$   
412  $2\beta$  heterotetrameric acyl coenzyme A dehydrogenase family. *Journal of bacteriology* **195**, 4331-  
413 4341, doi:10.1128/jb.00502-13 (2013).
- 414 14 Sasseti, C. M., Boyd, D. H. & Rubin, E. J. Genes required for mycobacterial growth defined by  
415 high density mutagenesis. *Molecular microbiology* **48**, 77-84 (2003).
- 416 15 DeJesus, M. A. *et al.* Comprehensive Essentiality Analysis of the *Mycobacterium tuberculosis*  
417 Genome via Saturating Transposon Mutagenesis. *MBio* **8**, doi:10.1128/mBio.02133-16 (2017).
- 418 16 Jones, D. T. Improving the accuracy of transmembrane protein topology prediction using  
419 evolutionary information. *Bioinformatics (Oxford, England)* **23**, 538-544,  
420 doi:10.1093/bioinformatics/btl677 (2007).

- 421 17 Schnappinger, D., O'Brien, K. M. & Ehrt, S. Construction of conditional knockdown mutants in  
422 mycobacteria. *Methods in molecular biology (Clifton, N.J.)* **1285**, 151-175, doi:10.1007/978-1-4939-  
423 2450-9\_9 (2015).
- 424 18 Beites, T. *et al.* Plasticity of the *Mycobacterium tuberculosis* respiratory chain and its impact on  
425 tuberculosis drug development. *Nature communications* **10**, 4970, doi:10.1038/s41467-019-  
426 12956-2 (2019).
- 427 19 Sato, K., Nishina, Y. & Shiga, K. Electron-transferring flavoprotein has an AMP-binding site in  
428 addition to the FAD-binding site. *Journal of biochemistry* **114**, 215-222,  
429 doi:10.1093/oxfordjournals.jbchem.a124157 (1993).
- 430 20 Ruzicka, F. J. & Beinert, H. A new iron-sulfur flavoprotein of the respiratory chain. A component  
431 of the fatty acid beta oxidation pathway. *The Journal of biological chemistry* **252**, 8440-8445  
432 (1977).
- 433 21 Henneberry, R. C. & Cox, C. D. Beta-oxidation of fatty acids by *Leptospira*. *Canadian journal of*  
434 *microbiology* **16**, 41-45, doi:10.1139/m70-007 (1970).
- 435 22 Nakajima, Y. *et al.* Three-dimensional structure of the flavoenzyme acyl-CoA oxidase-II from rat  
436 liver, the peroxisomal counterpart of mitochondrial acyl-CoA dehydrogenase. *Journal of*  
437 *biochemistry* **131**, 365-374, doi:10.1093/oxfordjournals.jbchem.a003111 (2002).
- 438 23 Wang, H. *et al.* Cloning and characterization of the peroxisomal acyl CoA oxidase ACO<sub>3</sub> gene  
439 from the alkane-utilizing yeast *Yarrowia lipolytica*. *Yeast (Chichester, England)* **14**, 1373-1386,  
440 doi:10.1002/(sici)1097-0061(199811)14:15<1373::Aid-yea332>3.o.Co;2-1 (1998).
- 441 24 Wang, H. J. *et al.* Evaluation of acyl coenzyme A oxidase (Aox) isozyme function in the n-alkane-  
442 assimilating yeast *Yarrowia lipolytica*. *Journal of bacteriology* **181**, 5140-5148,  
443 doi:10.1128/jb.181.17.5140-5148.1999 (1999).
- 444 25 Cook, G. M., Greening, C., Hards, K. & Berney, M. Energetics of pathogenic bacteria and  
445 opportunities for drug development. *Adv Microb Physiol* **65**, 1-62,  
446 doi:10.1016/bs.ampbs.2014.08.001 (2014).
- 447 26 Mahoney, E. M., Scott, W. A., Landsberger, F. R., Hamill, A. L. & Cohn, Z. A. Influence of fatty  
448 acyl substitution on the composition and function of macrophage membranes. *The Journal of*  
449 *biological chemistry* **255**, 4910-4917 (1980).
- 450 27 Dubos, R. J. The effect of lipids and serum albumin on bacterial growth. *The Journal of*  
451 *experimental medicine* **85**, 9-22, doi:10.1084/jem.85.1.9 (1947).
- 452 28 Galbraith, H. & Miller, T. B. Effect of long chain fatty acids on bacterial respiration and amino acid  
453 uptake. *The Journal of applied bacteriology* **36**, 659-675, doi:10.1111/j.1365-2672.1973.tb04151.x  
454 (1973).
- 455 29 Greenway, D. L. & Dyke, K. G. Mechanism of the inhibitory action of linoleic acid on the growth  
456 of *Staphylococcus aureus*. *Journal of general microbiology* **115**, 233-245, doi:10.1099/00221287-  
457 115-1-233 (1979).
- 458 30 Doi, H., Hoshino, Y., Nakase, K. & Usuda, Y. Reduction of hydrogen peroxide stress derived from  
459 fatty acid beta-oxidation improves fatty acid utilization in *Escherichia coli*. *Applied microbiology*  
460 *and biotechnology* **98**, 629-639, doi:10.1007/s00253-013-5327-6 (2014).
- 461 31 Zheng, C. J. *et al.* Fatty acid synthesis is a target for antibacterial activity of unsaturated fatty  
462 acids. *FEBS letters* **579**, 5157-5162, doi:10.1016/j.febslet.2005.08.028 (2005).
- 463 32 Zhang, Y. J. *et al.* Tryptophan biosynthesis protects mycobacteria from CD4 T-cell-mediated  
464 killing. *Cell* **155**, 1296-1308, doi:10.1016/j.cell.2013.10.045 (2013).

- 465 33 Watmough, N. J. & Frerman, F. E. The electron transfer flavoprotein: ubiquinone  
466 oxidoreductases. *Biochimica et biophysica acta* **1797**, 1910-1916,  
467 doi:10.1016/j.bbabi.2010.10.007 (2010).
- 468 34 Olsen, R. K. *et al.* Clear relationship between ETF/ETFDH genotype and phenotype in patients  
469 with multiple acyl-CoA dehydrogenation deficiency. *Human mutation* **22**, 12-23,  
470 doi:10.1002/humu.10226 (2003).
- 471 35 Zhang, L. *et al.* Comprehensive analysis of iron utilization by *Mycobacterium tuberculosis*. *PLoS*  
472 *pathogens* **16**, e1008337, doi:10.1371/journal.ppat.1008337 (2020).
- 473 36 Rodriguez, G. M., Voskuil, M. I., Gold, B., Schoolnik, G. K. & Smith, I. *ideR*, An essential gene in  
474 *Mycobacterium tuberculosis*: role of *IdeR* in iron-dependent gene expression, iron metabolism,  
475 and oxidative stress response. *Infection and immunity* **70**, 3371-3381, doi:10.1128/iai.70.7.3371-  
476 3381.2002 (2002).
- 477 37 Gold, B., Rodriguez, G. M., Marras, S. A., Pentecost, M. & Smith, I. The *Mycobacterium*  
478 *tuberculosis* *IdeR* is a dual functional regulator that controls transcription of genes involved in iron  
479 acquisition, iron storage and survival in macrophages. *Molecular microbiology* **42**, 851-865,  
480 doi:10.1046/j.1365-2958.2001.02684.x (2001).
- 481 38 Székely, R. *et al.* 6,11-Dioxobenzo[f]pyrido[1,2-a]indoles Kill *Mycobacterium tuberculosis* by  
482 Targeting Iron-Sulfur Protein Rv0338c (*IspQ*), A Putative Redox Sensor. *ACS infectious diseases*  
483 **6**, 3015-3025, doi:10.1021/acscinfdis.0c00531 (2020).
- 484 39 Kim, J. H. *et al.* Protein inactivation in mycobacteria by controlled proteolysis and its application  
485 to deplete the beta subunit of RNA polymerase. *Nucleic acids research* **39**, 2210-2220,  
486 doi:10.1093/nar/gkq1149 (2011).
- 487 40 Jansen, R. S. *et al.* Aspartate aminotransferase Rv3722c governs aspartate-dependent nitrogen  
488 metabolism in *Mycobacterium tuberculosis*. *Nature communications* **11**, 1960, doi:10.1038/s41467-  
489 020-15876-8 (2020).
- 490 41 Robinson, J. T. *et al.* Integrative genomics viewer. *Nature Biotechnology* **29**, 24,  
491 doi:10.1038/nbt.1754 (2011).
- 492 42 Thorvaldsdottir, H., Robinson, J. T. & Mesirov, J. P. Integrative Genomics Viewer (IGV): high-  
493 performance genomics data visualization and exploration. *Briefings in bioinformatics* **14**, 178-192,  
494 doi:10.1093/bib/bbs017 (2013).
- 495 43 Robinson, J. T., Thorvaldsdottir, H., Wenger, A. M., Zehir, A. & Mesirov, J. P. Variant Review with  
496 the Integrative Genomics Viewer. *Cancer research* **77**, e31-e34, doi:10.1158/0008-5472.Can-17-  
497 0337 (2017).
- 498 44 Braunstein, M. *et al.* Identification of genes encoding exported *Mycobacterium tuberculosis*  
499 proteins using a Tn552'*phoA* in vitro transposition system. *Journal of bacteriology* **182**, 2732-2740,  
500 doi:10.1128/jb.182.10.2732-2740.2000 (2000).
- 501 45 Nandakumar, M., Prosser, G. A., de Carvalho, L. P. & Rhee, K. Metabolomics of *Mycobacterium*  
502 *tuberculosis*. *Methods in molecular biology (Clifton, N.J.)* **1285**, 105-115, doi:10.1007/978-1-4939-  
503 2450-9\_6 (2015).
- 504 46 Goncalves, M. D. *et al.* High-fructose corn syrup enhances intestinal tumor growth in mice.  
505 *Science (New York, N.Y.)* **363**, 1345-1349, doi:10.1126/science.aat8515 (2019).
- 506 47 Haug, K. *et al.* MetaboLights: a resource evolving in response to the needs of its scientific  
507 community. *Nucleic acids research* **48**, D440-d444, doi:10.1093/nar/gkz1019 (2020).
- 508 48 Zimmermann, L. *et al.* A Completely Reimplemented MPI Bioinformatics Toolkit with a New  
509 HHpred Server at its Core. *Journal of molecular biology* **430**, 2237-2243,  
510 doi:10.1016/j.jmb.2017.12.007 (2018).

511 49 Slabinski, L. *et al.* XtalPred: a web server for prediction of protein crystallizability. *Bioinformatics*  
512 *(Oxford, England)* **23**, 3403-3405, doi:10.1093/bioinformatics/btm477 (2007).

513 50 Jensen, L. J. *et al.* eggNOG: automated construction and annotation of orthologous groups of  
514 genes. *Nucleic acids research* **36**, D250-254, doi:10.1093/nar/gkm796 (2008).

515 51 Letunic, I. & Bork, P. Interactive Tree Of Life (iTOL) v4: recent updates and new developments.  
516 *Nucleic acids research* **47**, W256-w259, doi:10.1093/nar/gkz239 (2019).

517 52 UniProt: a worldwide hub of protein knowledge. *Nucleic acids research* **47**, D506-d515,  
518 doi:10.1093/nar/gky1049 (2019).

519 53 Asnicar, F., Weingart, G., Tickle, T. L., Huttenhower, C. & Segata, N. Compact graphical  
520 representation of phylogenetic data and metadata with GraPhlAn. *PeerJ* **3**, e1029,  
521 doi:10.7717/peerj.1029 (2015).

522

523

524

525

526

527

528

529

530

531

532

533

534

535

536

537

538



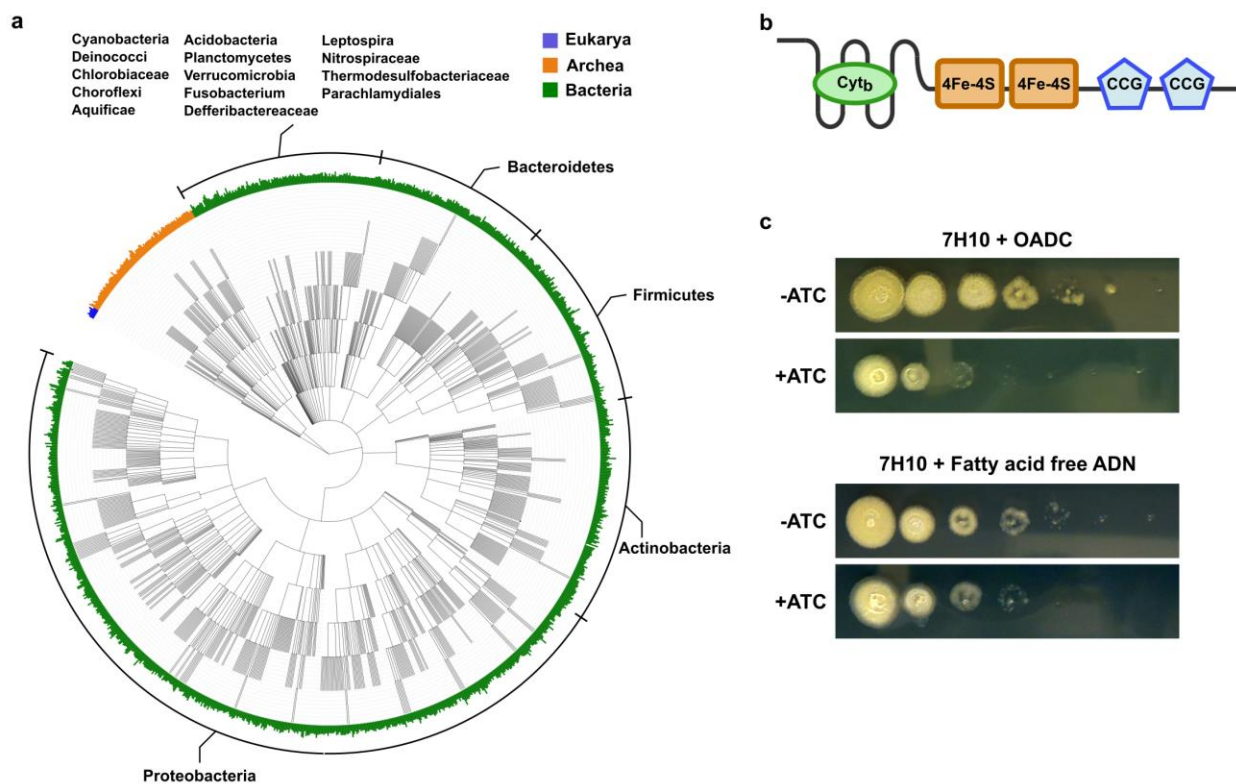

539

540 **Fig. 1. EtfD is a membrane protein possibly involved in Mtb's energy metabolism.**

541 **a**, Rootless phylogenetic tree with species containing members of COG0247 according to the database  
 542 of the webtool EggNog. The inner colored ring corresponds to life domains, while the outer ring refers to  
 543 bacteria phyla. Cyt<sub>b</sub> – cytochrome b, CCG – cysteine-rich domain. **b**, Domain architecture of EtfD based  
 544 on the algorithms of HHPred and Xtalpred. **c**, Spot assay on solid media with an EtfD-TetOFF strain,  
 545 where protein levels are controlled by anhydrotetracycline (ATC). Serial dilutions ( $10^6$  down to  $10^1$   
 546 bacteria) were incubated for 14 days. These results are representative of 3 independent experiments.

547

548

549

550

551



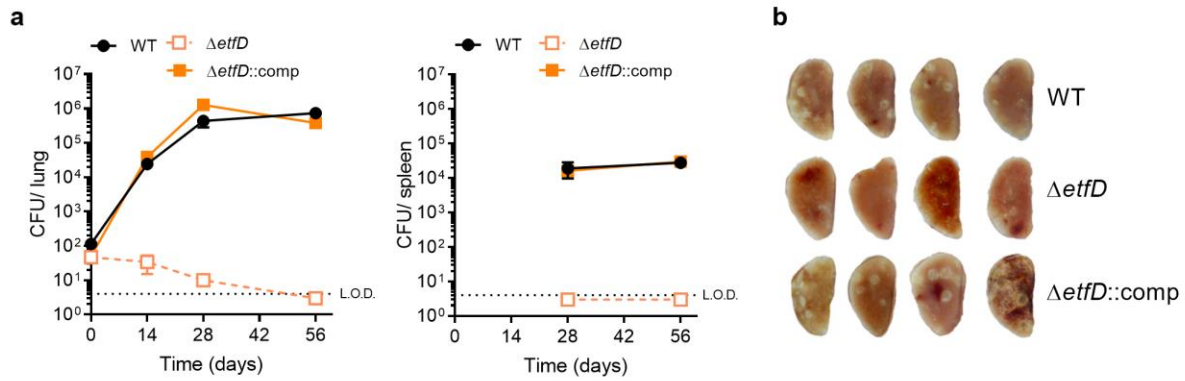

552

553 **Fig. 2. EtfD is essential for growth and survival in vivo. a,** Growth and persistence of wild type Mtb,  $\Delta etfD$

554 and the complemented mutant in mouse lungs and spleens. Data are CFU averages from four mice per time

555 point and are representative of two independent experiments. Error bars correspond to standard deviation.

556 “Comp” stands for complemented. L.O.D. stands for limit of detection. **b,** Gross pathology of lungs

557 infected with wild-type Mtb,  $\Delta etfD$  and the complemented mutant at day 56.

558

559

560

561

562

563

564

565

566

567

568

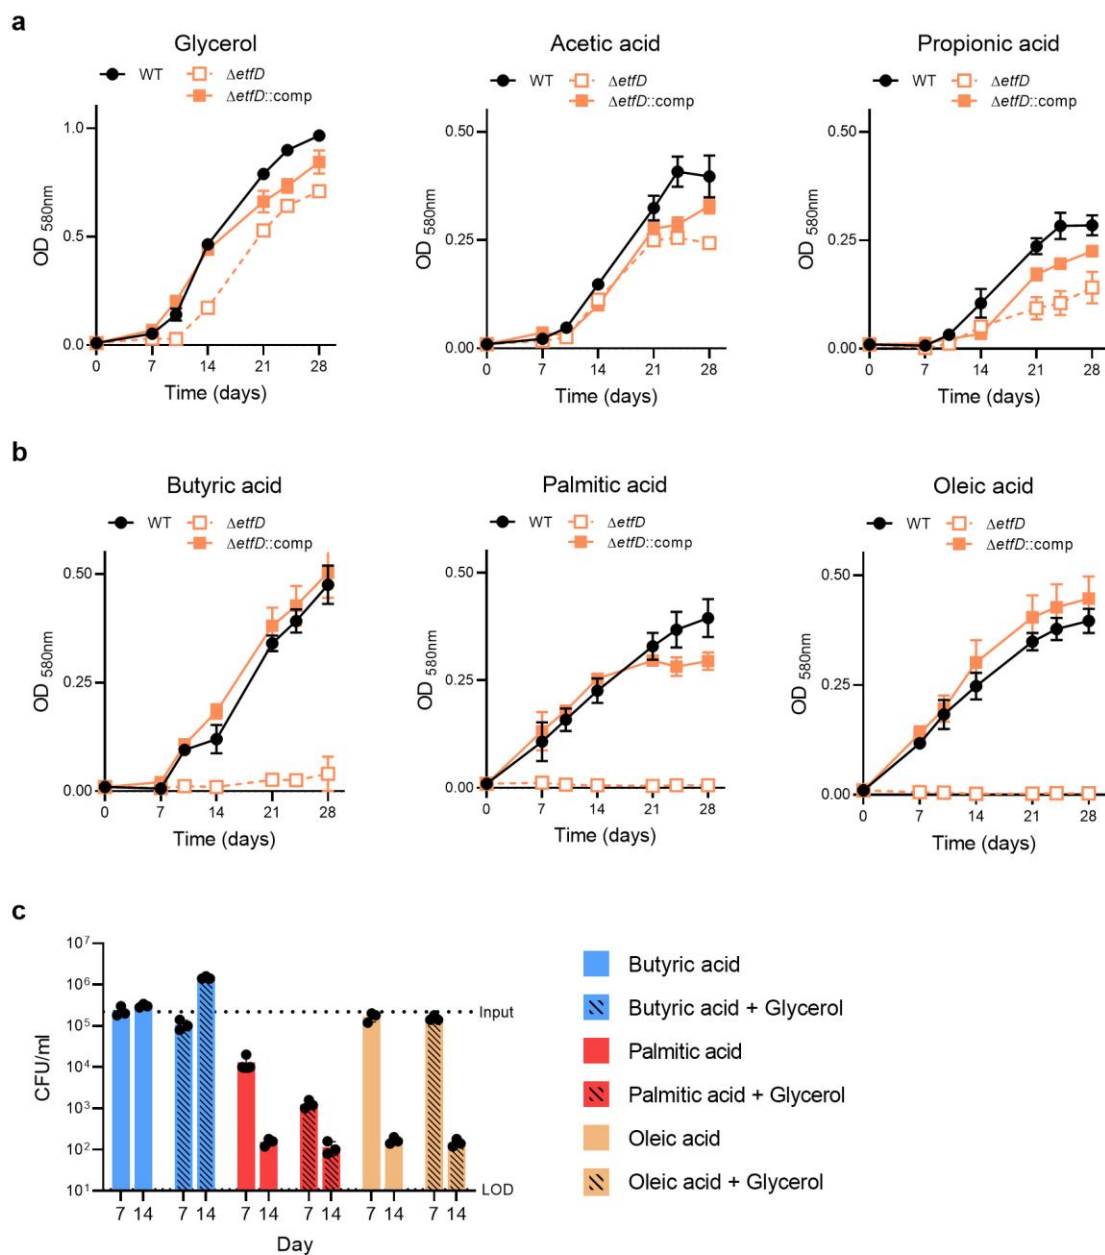

569

570 **Fig. 3. EtfD is necessary for the utilization of fatty acids that require  $\beta$ -oxidation.** Strains were grown in media with  
 571 single carbon sources that (a) do not require and (b) require  $\beta$ -oxidation for catabolism. Carbon sources were used at  
 572 the following final concentrations: glycerol 25 mM, acetic acid 25 mM, propionic acid 2.5 mM, butyric acid 2.5 mM,  
 573 palmitic acid 250  $\mu$ M and oleic acid 250  $\mu$ M. To sustain growth and avoid toxicity palmitic acid and oleic acid were  
 574 replenished every 3 to 4 days for the first 14 days of culture. Data are averages of 3 replicates and are representative of

575 3 independent experiments. Error bars correspond to standard deviation. "Comp" stands for complemented. **c**,  
576 Viability of *ΔetfD* in media with single carbon sources (butyric acid, palmitic acid and oleic acid), or in mixed carbon  
577 sources (fatty acids and glycerol) at the same concentrations used in (a) and (b) was assessed at days 7 and 14. Data  
578 are averages of 3 replicates and are representative of 3 independent experiments. Error bars correspond to  
579 standard deviation. "Comp" stands for complemented. LOD stands for limit of detection.

580

581

582

583

584

585

586

587

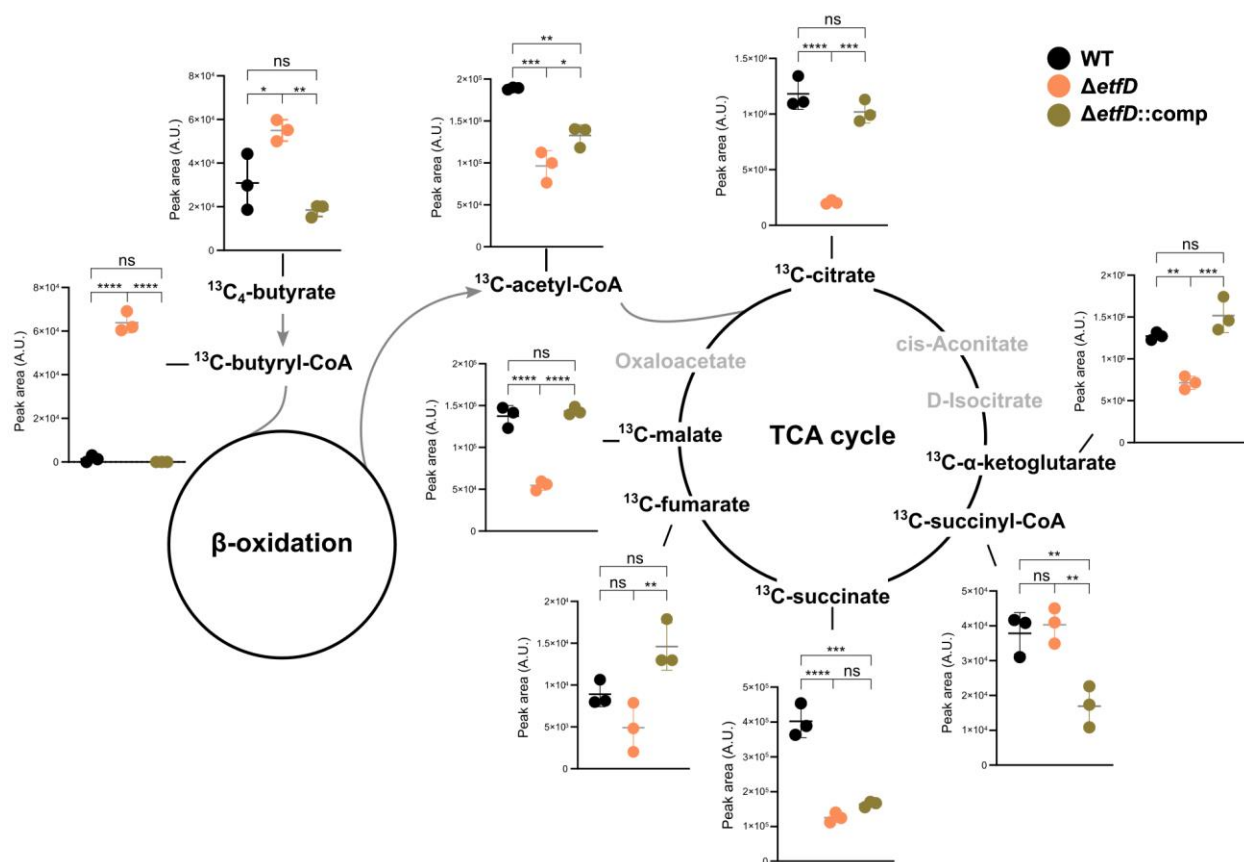

588

589 **Fig. 4. Stable isotope tracing reveals a block in  $\beta$ -oxidation at the level of acyl-CoA dehydrogenases.**

590 Strains were grown on filters on top of solid medium permissible to  $\Delta etfD$  growth for 7 days and then

591 transferred to solid media with  $^{13}\text{C}_4$ -labelled butyric acid (2.5 mM) as single carbon source for 24 hrs.

592 Levels of the indicated  $^{13}\text{C}$ -labelled metabolites (total  $^{13}\text{C}$  pool, except for  $^{13}\text{C}_4$ -butyrate) were quantified  
593 by LC-MS analysis. Data correspond to 3 replicates and are representative of 2 independent experiments.

594 Error bars correspond to standard deviation. "Comp" stands for complemented. Statistical significance

595 was assessed by one-way ANOVA followed by post hoc test (Tukey test; GraphPad Prism). \* $P < 0.05$ ;

596 \*\* $P < 0.01$ ; \*\*\* $P < 0.001$ ; \*\*\*\* $P < 0.0001$ . ns – not significant. # - metabolites with no statistically

597 significant difference between wild-type and  $\Delta etfD$  in the second independent experiment.

598

599

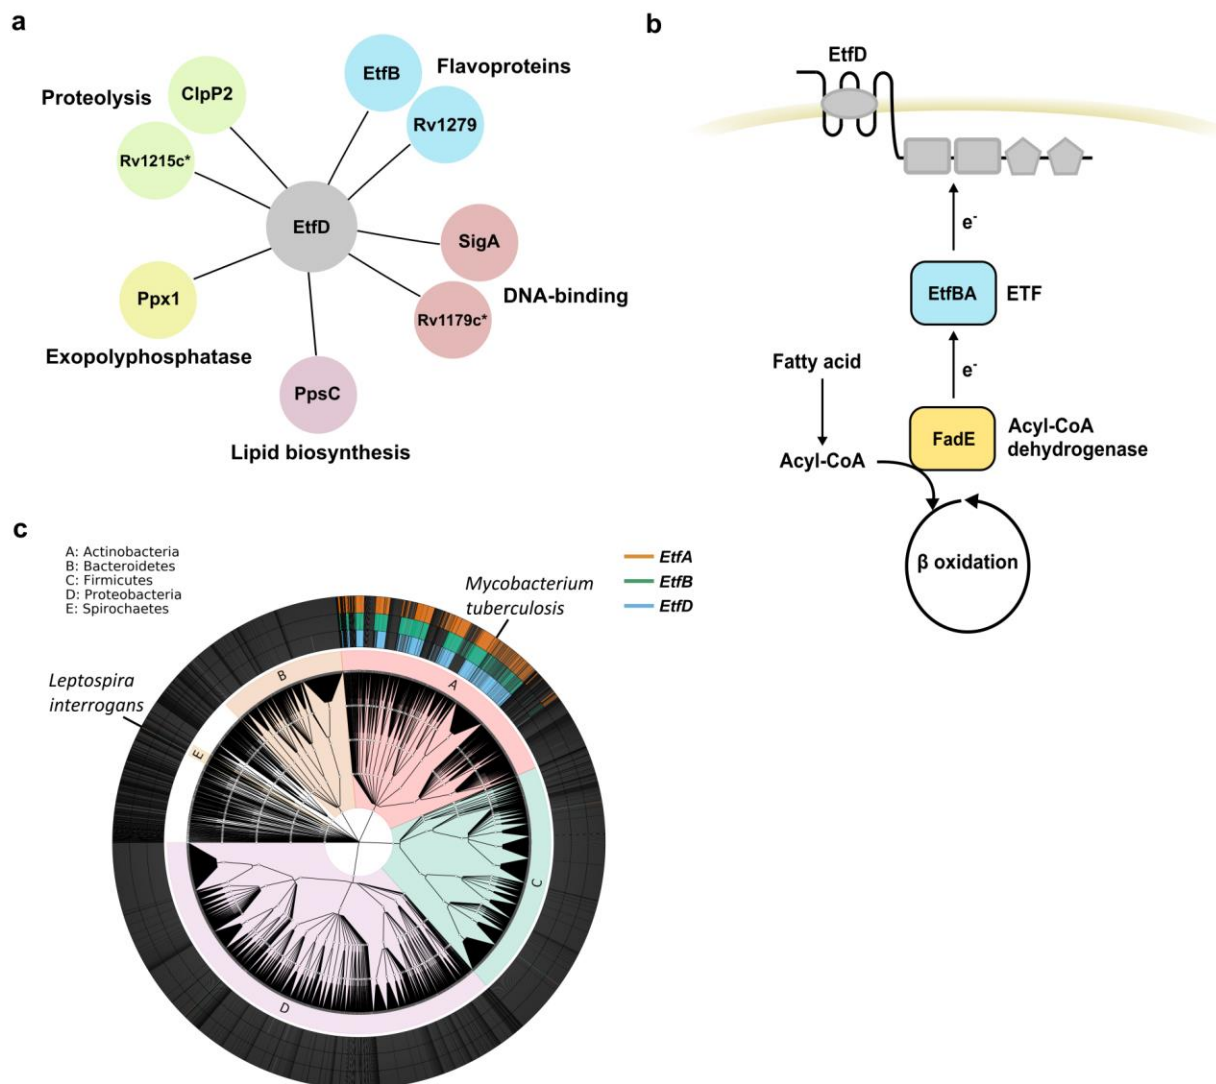

600

601 **Fig. 5. EtfD and EtfBA interaction and co-occurrence.** **a**, EtfD cytoplasmic interactors identified by protein co-  
 602 immunoprecipitation. **b**, Model for the pathway constituted by EtfD and EtfBA. **c**, Uniprot bacterial proteome  
 603 database was surveyed for EtfD and EtfBA putative homologues. The inner ring corresponds to Phyla and the outer  
 604 rings represent strains with a hit (>30 % identity and >75% coverage) for EtfD, EtfB or EtfA. \* in silico prediction.

605

606

607

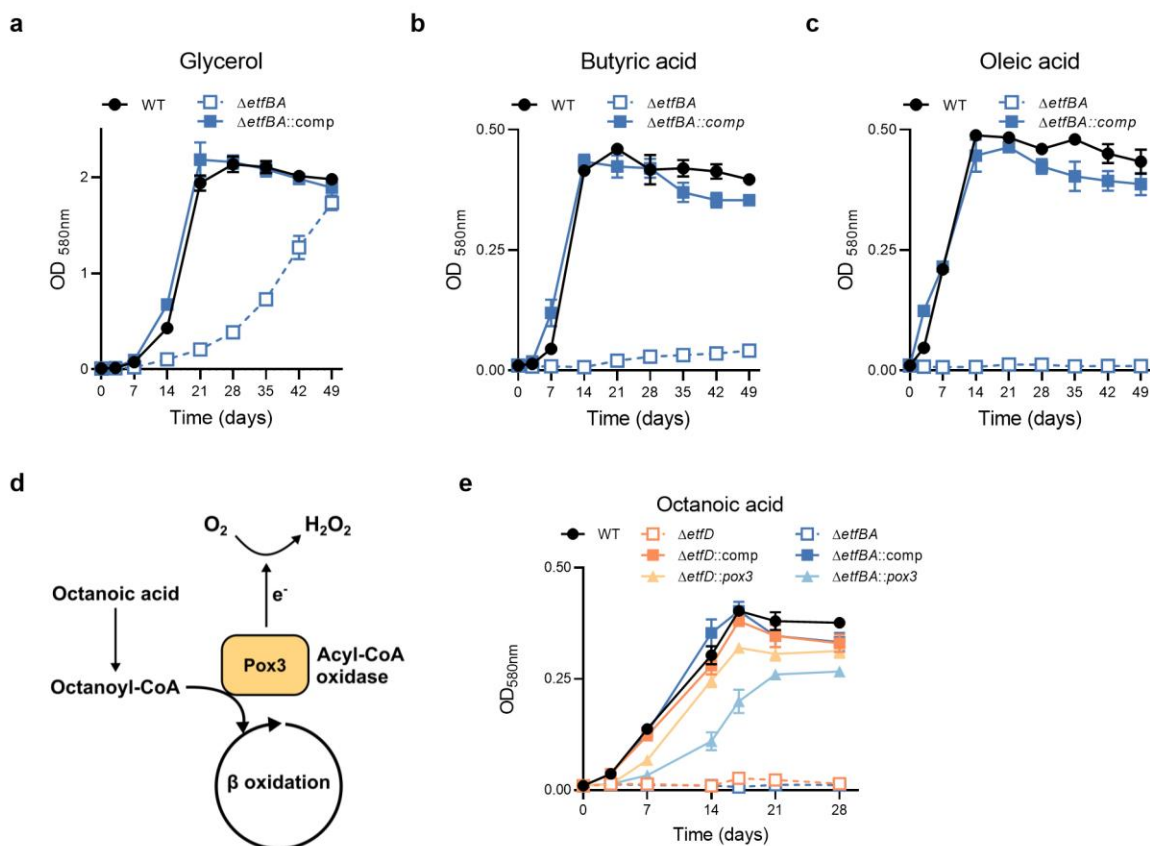

608

609 **Fig. 6. EtfD and EtfBA constitute a pathway necessary for the activity of acyl-coA dehydrogenases.**

610 Growth with 25 mM glycerol (a), 2.5 mM butyric acid (b) and 250  $\mu$ M oleic acid (c) as single carbon

611 sources. Oleic acid was replenished every 3 to 4 days for the first 14 days of culture to support growth and

612 minimize toxicity. Data are averages of 3 replicates and are representative of 3 independent experiments.

613 Error bars correspond to standard deviation. "Comp" stands for complemented. d, Diagram representing

614 acyl-coA oxidase activity on octanoic acid. e, Rescue of  $\Delta etfD$  and  $\Delta etfBA$  growth with 250  $\mu$ M octanoic

615 acid as sole carbon source with the expression of the acyl-CoA oxidase Pox3. Octanoic acid was

616 replenished every 3 to 4 days for the first 14 days of culture to support growth and minimize toxicity. Data

617 are averages of 3 replicates.

618
